# Supplementary material for: Statistical Inference for Aggregation of Malmquist Productivity Indices
Source: Atypon-hosted journal article supplement (doi:10.1287/opre.2022.2424), 2023-01-13
Supplement: opre.2022.2424.sm1.pdf [file opre.2022.2424.sm1.pdf]

## Supplement: Technical details and Monte Carlo Evidence

### Appendix EC.1: Proofs of theorems

#### EC.1.1. Proof of Theorem 1

Consider the function  $\Lambda : \mathbb{R}_{++} \rightarrow \mathbb{R}_{++}$  defined by  $\Lambda(x) = x^{-1}$ . Clearly,  $\Lambda(\cdot)$  is monotonic, invertible, and differentiable with nonzero derivatives on  $\mathbb{R}_{++}$ . Hence, Theorem 3.2 of KSW2021 still holds true if  $\Lambda(\cdot)$  substitutes the function  $\Gamma : \mathbb{R}_+ \rightarrow \mathbb{R}_+$  defined by  $\Gamma(x) = x^{0.5}$  in the theorem. Similarly, the proof of Theorem 3.4 of KSW2021 is still valid if  $\Lambda(\cdot)$  replaces the function  $\Gamma : \mathbb{R}_{++} \rightarrow \mathbb{R}_{++}$  defined by  $\Gamma(x) = \log x^{0.5}$  there. Combining these facts with Lemmas 3.1 and 3.2 of KSW2021, we can obtain asymptotic properties of the conical Farrell-type output-oriented efficiency estimators, which is analogous to Theorem 3.4 of KSW2021. Formally, there exist constants  $\bar{C}_{st} \in (0, \infty)$  such that as  $n \rightarrow \infty$ ,

$$E(\lambda_C(Z_i^s | \mathcal{X}_n^t) - \lambda_C(Z_i^s | \Psi^t)) = \bar{C}_{st} n^{-\kappa} + O(v_{n,\kappa}), \quad (\text{EC.1})$$

$$E\left([\lambda_C(Z_i^s | \mathcal{X}_n^t) - \lambda_C(Z_i^s | \Psi^t)]^2\right) = o(n^{-\kappa}), \quad (\text{EC.2})$$

$$\left|E\left([\lambda_C(Z_i^s | \mathcal{X}_n^t) - E(\lambda_C(Z_i^s | \mathcal{X}_n^t))][\lambda_C(Z_j^{s^*} | \mathcal{X}_n^{t^*}) - E(\lambda_C(Z_j^{s^*} | \mathcal{X}_n^{t^*}))]\right)\right| = o(n^{-1}), \quad (\text{EC.3})$$

for all  $i, j \in \{1, \dots, n\}, i \neq j; s, t, s^*, t^* \in \{1, 2\}$ .

For each  $i = 1, \dots, n$ , since the first two moments of  $w^2 Y_i^2$  are finite and

$$\widehat{U}_{1,i} - U_{1,i} = (\lambda_C(Z_i^2 | \mathcal{X}_n^1) - \lambda_C(Z_i^2 | \Psi^1)) w^2 Y_i^2, \quad (\text{EC.4})$$

the order of the first two moments of  $\widehat{U}_{1,i} - U_{1,i}$  inherits those from  $\lambda_C(Z_i^2 | \mathcal{X}_n^1) - \lambda_C(Z_i^2 | \Psi^1)$  and similarly, we have the same conclusions for  $\widehat{U}_{s,i} - U_{s,i}$  ( $s = 2, 3, 4$ ). Also, the order of  $Cov(\widehat{U}_{1,i}, \widehat{U}_{2,j})$  is the same as that of  $Cov(\lambda_C(Z_i^2 | \mathcal{X}_n^1), \lambda_C(Z_j^2 | \mathcal{X}_n^2))$  ( $j = 1, \dots, n; j \neq i$ ), and similar conclusions can be drawn for the other analogous covariances. These facts imply that Theorem 1 holds true for  $s, t \in \{1, 2, 3, 4\}$ .

### EC.1.2. Proof of Theorem 2

(i) This part is a direct consequence of (21).

(ii) To begin with, we decompose  $Cov(\widehat{U}_{t,i}, \widehat{U}_{t^*,i})$  as

$$\begin{aligned}
Cov(\widehat{U}_{t,i}, \widehat{U}_{t^*,i}) &= E \left( \left[ \widehat{U}_{t,i} - E(\widehat{U}_{t,i}) \right] \left[ \widehat{U}_{t^*,i} - E(\widehat{U}_{t^*,i}) \right] \right) \\
&= E \left( \left[ \widehat{U}_{t,i} - U_{t,i} + U_{t,i} - E(\widehat{U}_{t,i}) \right] \left[ \widehat{U}_{t^*,i} - U_{t^*,i} + U_{t^*,i} - E(\widehat{U}_{t^*,i}) \right] \right) \\
&= E \left( [\widehat{U}_{t,i} - U_{t,i}][\widehat{U}_{t^*,i} - U_{t^*,i}] \right) + E \left( [U_{t,i} - E(\widehat{U}_{t,i})][U_{t^*,i} - E(\widehat{U}_{t^*,i})] \right) \\
&\quad + E \left( [\widehat{U}_{t,i} - U_{t,i}][U_{t^*,i} - E(\widehat{U}_{t^*,i})] \right) + E \left( [U_{t,i} - E(\widehat{U}_{t,i})][\widehat{U}_{t^*,i} - U_{t^*,i}] \right). \quad (\text{EC.5})
\end{aligned}$$

Now we evaluate the rates of convergence of each term in the above decomposition of  $Cov(\widehat{U}_{t,i}, \widehat{U}_{t^*,i})$ .

First, by the Cauchy-Schwartz inequality and (22), we have

$$\left( E([\widehat{U}_{t,i} - U_{t,i}][\widehat{U}_{t^*,i} - U_{t^*,i}]) \right)^2 \leq E([\widehat{U}_{t,i} - U_{t,i}]^2) E([\widehat{U}_{t^*,i} - U_{t^*,i}]^2) = o(n^{-\kappa})o(n^{-\kappa}), \quad (\text{EC.6})$$

and hence,

$$E([\widehat{U}_{t,i} - U_{t,i}][\widehat{U}_{t^*,i} - U_{t^*,i}]) = o(n^{-\kappa}). \quad (\text{EC.7})$$

Next, the second term in (EC.5) can be expressed as

$$\begin{aligned}
&E \left( [U_{t,i} - E(\widehat{U}_{t,i})][U_{t^*,i} - E(\widehat{U}_{t^*,i})] \right) \\
&= E \left( [U_{t,i} - E(U_{t,i}) + E(U_{t,i}) - E(\widehat{U}_{t,i})][U_{t^*,i} - E(U_{t^*,i}) + E(U_{t^*,i}) - E(\widehat{U}_{t^*,i})] \right) \\
&= E \left( [U_{t,i} - E(U_{t,i})][U_{t^*,i} - E(U_{t^*,i})] \right) + E \left( [U_{t,i} - E(U_{t,i})][E(U_{t^*,i}) - E(\widehat{U}_{t^*,i})] \right) \\
&\quad + E \left( [E(U_{t,i}) - E(\widehat{U}_{t,i})][U_{t^*,i} - E(U_{t^*,i})] \right) + E \left( [E(U_{t,i}) - E(\widehat{U}_{t,i})][E(U_{t^*,i}) - E(\widehat{U}_{t^*,i})] \right) \\
&= \sigma_{tt^*} + 0 + 0 + E(U_{t,i} - \widehat{U}_{t,i})E(U_{t^*,i} - \widehat{U}_{t^*,i}) \\
&= \sigma_{tt^*} + E(U_{t,i} - \widehat{U}_{t,i})E(U_{t^*,i} - \widehat{U}_{t^*,i}). \quad (\text{EC.8})
\end{aligned}$$

Thus, by (21), we have

$$E \left( [U_{t,i} - E(\widehat{U}_{t,i})][U_{t^*,i} - E(\widehat{U}_{t^*,i})] \right) = \sigma_{tt^*} + (C_t n^{-\kappa} + o(n^{-\kappa}))(C_{t^*} n^{-\kappa} + o(n^{-\kappa}))$$

$$= \sigma_{tt^*} + o(n^{-\kappa}). \quad (\text{EC.9})$$

Third, by the Cauchy-Schwartz inequality, (22) and applying (EC.9) with  $t = t^*$ , we obtain

$$\begin{aligned} \left( E([\widehat{U}_{t,i} - U_{t,i}][U_{t^*,i} - E(\widehat{U}_{t^*,i})]) \right)^2 &\leq E([\widehat{U}_{t,i} - U_{t,i}]^2) E([U_{t^*,i} - E(\widehat{U}_{t^*,i})]^2) \\ &= o(n^{-\kappa}) (\sigma_{t^*t^*} + o(n^{-\kappa})) = o(n^{-\kappa}). \end{aligned} \quad (\text{EC.10})$$

Consequently,

$$E([\widehat{U}_{t,i} - U_{t,i}][U_{t^*,i} - E(\widehat{U}_{t^*,i})]) = o(n^{-\kappa/2}). \quad (\text{EC.11})$$

By swapping the positions of  $t$  and  $t^*$  in (EC.11), we obtain the result for the last term in (EC.5) below.

$$E([U_{t,i} - E(\widehat{U}_{t,i})][\widehat{U}_{t^*,i} - U_{t^*,i}]) = o(n^{-\kappa/2}). \quad (\text{EC.12})$$

Combining (EC.5), (EC.7), (EC.9), (EC.11), and (EC.12), we have part (ii) proved.

(iii) It can be seen that

$$\begin{aligned} \text{Cov}(\widehat{U}_{s,i}, U_{r,i}) &= E([\widehat{U}_{s,i} - E(\widehat{U}_{s,i})][U_{r,i} - \mu_r]) \\ &= E([\widehat{U}_{s,i} - U_{s,i} + U_{s,i} - \mu_s + \mu_s - E(\widehat{U}_{s,i})][U_{r,i} - \mu_r]) \\ &= E([\widehat{U}_{s,i} - U_{s,i}][U_{r,i} - \mu_r]) + \sigma_{sr} + E([\mu_s - E(\widehat{U}_{s,i})][U_{r,i} - \mu_r]) \\ &= E([\widehat{U}_{s,i} - U_{s,i}][U_{r,i} - \mu_r]) + \sigma_{sr}. \end{aligned} \quad (\text{EC.13})$$

By the Cauchy-Schwartz inequality and (22),

$$\left( E([\widehat{U}_{s,i} - U_{s,i}][U_{r,i} - \mu_r]) \right)^2 \leq E([\widehat{U}_{s,i} - U_{s,i}]^2) E([U_{r,i} - \mu_r]^2) = o(n^{-\kappa}) \sigma_{rr} = o(n^{-\kappa}).$$

Thus,  $E([\widehat{U}_{s,i} - U_{s,i}][U_{r,i} - \mu_r]) = o(n^{-\kappa/2})$  and part (iii) follows directly from (EC.13).

### EC.1.3. Proof of Theorem 3

Consider the random variables  $\chi_{s,n} = n^{-1} \sum_{i=1}^n (\widehat{U}_{s,i} - U_{s,i}) = \widehat{\mu}_{s,n} - \widehat{\mu}_{s,n}$  ( $s = 1, \dots, 4$ ). Part (i) follows directly from Theorem 2(i) as follows.

$$\widetilde{\mu}_{s,n} - \mu_s = E(\chi_{s,n}) = n^{-1} \sum_{i=1}^n E(\widehat{U}_{s,i} - U_{s,i}) = C_s n^{-\kappa} + o(n^{-\kappa}). \quad (\text{EC.14})$$

Now from Theorem 1 we have

$$\begin{aligned} \text{Var}(\chi_{s,n}) &= n^{-2} \sum_{i=1}^n \text{Var}(\widehat{U}_{s,i} - U_{s,i}) = n^{-2} \sum_{i=1}^n \left( E\left([\widehat{U}_{s,i} - U_{s,i}]^2\right) - \left(E(\widehat{U}_{s,i} - U_{s,i})\right)^2 \right) \\ &= n^{-1} \left( o(n^{-\kappa}) - (C_s n^{-\kappa} + o(n^{-\kappa}))^2 \right) = n^{-1} o(n^{-\kappa}). \end{aligned} \quad (\text{EC.15})$$

By Markov's inequality (see, e.g., Van der Vaart 2000, page 10), we have that for any  $\epsilon > 0$ ,

$$\Pr(\sqrt{n}|\chi_{s,n} - E(\chi_{s,n})| > \epsilon) \leq \frac{E(n(\chi_{s,n} - E(\chi_{s,n}))^2)}{\epsilon^2} = \frac{n\text{Var}(\chi_{s,n})}{\epsilon^2} = \frac{o(n^{-\kappa})}{\epsilon^2}. \quad (\text{EC.16})$$

Therefore,  $\sqrt{n}(\chi_{s,n} - E(\chi_{s,n})) = o_p(1)$  or equivalently,  $\chi_{s,n} - E(\chi_{s,n}) = o_p(n^{-1/2})$ . Consequently,

$$(\widehat{\mu}_{s,n} - \widetilde{\mu}_{s,n}) - (\widehat{\mu}_{s,n} - \mu_s) = (\widehat{\mu}_{s,n} - \widehat{\mu}_{s,n}) - (\widetilde{\mu}_{s,n} - \mu_s) = \chi_{s,n} - E(\chi_{s,n}) = o_p(n^{-1/2}), \quad (\text{EC.17})$$

implying (ii).

To prove part (iii), we recall from (75) that

$$\sqrt{n}(\widehat{\mu}_{s,n} - \mu_s) \xrightarrow{d} \mathcal{N}(0, \sigma_{ss}), \quad s = 1, \dots, 6. \quad (\text{EC.18})$$

Combining this with (ii), we have

$$\sqrt{n}(\widehat{\mu}_{s,n} - \widetilde{\mu}_{s,n}) = \sqrt{n}(\widehat{\mu}_{s,n} - \mu_s + o_p(n^{-1/2})) = \sqrt{n}(\widehat{\mu}_{s,n} - \mu_s) + o_p(1) \xrightarrow{d} \mathcal{N}(0, \sigma_{ss}), \quad (\text{EC.19})$$

and hence, (iii) is proved.

Now it follows from parts (i) and (iii) that  $\widehat{\mu}_{s,n} \xrightarrow{p} \mu_s$  for  $s = 1, \dots, 4$ . Combining this with Theorem 2 and using the standard central limit theorem, we have that as  $n \rightarrow \infty$ ,

$$\widehat{\sigma}_{st,n} = n^{-1} \sum_{i=1}^n (\widehat{U}_{s,i} - \widehat{\mu}_{s,n})(\widehat{U}_{t,i} - \widehat{\mu}_{t,n}) = n^{-1} \sum_{i=1}^n \widehat{U}_{s,i} \widehat{U}_{t,i} - \widehat{\mu}_{s,n} \widehat{\mu}_{t,n}$$

$$\begin{aligned}
& \xrightarrow{p} E(\widehat{U}_{s,1}\widehat{U}_{t,1}) - \mu_s\mu_t = Cov(\widehat{U}_{s,1},\widehat{U}_{t,1}) + E(\widehat{U}_{s,1})E(\widehat{U}_{t,1}) - \mu_s\mu_t \\
& = (\sigma_{st} + o(n^{-\kappa/2})) + (\mu_s + C_s n^{-\kappa} + O(v_{n,\kappa}))(\mu_t + C_t n^{-\kappa} + O(v_{n,\kappa})) - \mu_s\mu_t \\
& \longrightarrow \sigma_{st}, \tag{EC.20}
\end{aligned}$$

which implies part (iv). Part (v) can be proved by using similar arguments as those used for part (iv); meanwhile part (vi) is a well-known result as mentioned in (81).

## Appendix EC.2: A uniform delta method (Van der Vaart 2000)

We reproduce Theorem 3.8 of Van der Vaart (2000) here with a small change of notation and presentation for consistency throughout this paper and for convenience in the application in the proofs of our theorems.

LEMMA EC.1. *Let  $\Theta : \mathbb{R}^k \rightarrow \mathbb{R}^m$  be a continuously differentiable function in a neighborhood of  $h \in \mathbb{R}^k$ . Let  $H_n$  be random vectors taking their values in the domain of  $\Theta$ . If  $\vartheta_n(H_n - h_n) \xrightarrow{d} H$  for vectors  $h_n \rightarrow h$  and numbers  $\vartheta_n \rightarrow \infty$ , then we have*

$$(i) \quad \Theta(H_n) - \Theta(h_n) = \nabla\Theta(h)(H_n - h_n) + o_p(\vartheta_n^{-1}), \quad (\text{EC.21})$$

$$(ii) \quad \vartheta_n (\Theta(H_n) - \Theta(h_n)) \xrightarrow{d} \nabla\Theta(h)H, \quad (\text{EC.22})$$

where  $\nabla\Theta(h)$  denotes the  $(m \times k)$  matrix gradients of  $\Theta(\cdot)$  evaluated at  $h$ .

*Proof.* See Theorem 3.8 of Van der Vaart (2000).

## Appendix EC.3: Monte Carlo Experiments

We have conducted Monte Carlo experiments to investigate the finite-sample performance of the statistical inferences proposed in this paper, focusing on confidence intervals and hypothesis testing. Regarding the confidence intervals, we analyze their estimated coverages which are calculated as the percentage of times an estimated confidence interval covers the true value of the parameter of interest, given the pre-determined level of significance  $\alpha$ . For hypothesis testing, we examine the size and power of tests of productivity change from period 1 to period 2 via rates of rejection of the null hypothesis. In particular, the null hypothesis of no productivity change corresponds to  $\xi = 0$ , depending on which estimator is used to conduct the test. Meanwhile, the alternative hypothesis that the productivity has changed from period 1 to period 2 corresponds to  $\xi \neq 0$ . The rejection rates are computed as the percentage of times an estimated confidence interval does not cover zero.

### EC.3.1. A data generating process

In this paper, we employ a new data generating process that possesses the essential properties needed for this type of experiment, typically: (i) the technologies in both periods exhibit VRS; (ii) the productivity change between two periods can be controlled via a pre-determined parameter, say  $\delta$ ; (iii) the technical efficiency scores of any particular DMU in two time periods are correlated and can be controlled via a pre-determined parameter, namely  $\rho_\lambda$ ; (iv) the sizes (i.e., inputs amounts) of any particular DMU in two time periods are correlated and can be controlled via a pre-determined parameter, say  $\rho$ .

In particular, we assume that the true technology in the period  $t$  is characterized by

$$\Psi^t = \{(x, y) \in \mathbb{R}_+^p \times \mathbb{R}_+^1 : y \leq \psi^t(x)\}, \quad t = 1, 2, \quad (\text{EC.23})$$

where  $\psi^t(x) = \Upsilon^t(x_1 - b_1^t)^{\beta_1^t} \dots (x_p - b_p^t)^{\beta_p^t}$ ,  $\beta_j^t, b_j^t > 0$ ,  $\sum_{j=1}^p \beta_j^t < 1$ . Note that  $\psi^t(x)$  resembles the Stone-Geary utility function (Geary 1950, Stone 1954) and was used in a production context by Beattie and Aradhyula (2015).

In order to control the degree to which the production frontier in period 2 is different from that in period 1, we set  $\Upsilon^2 = \Upsilon^1 + \delta$  and  $b_j^1 = b_j^2$ ,  $\beta_j^2 = \beta_j^1 + \delta$  ( $j = 1, \dots, p$ ), where  $\delta$  is the predetermined parameter mentioned above. In order to guarantee that the function  $\psi^t(\cdot)$  is well-defined, we also need  $x_j \geq b_j^t$  for  $j = 1, \dots, p$ ,  $t = 1, 2$ . This constraint is reasonable from the economic viewpoint since it illustrates that firms incur fixed costs or some threshold expenses (i.e.,  $b_i^t$ ) in order to start producing positive outputs. Our data generating process includes three steps, as described below.

1. For each  $t = 1, 2$ , generate  $n$  points of the form  $(x_i^t, \psi^t(x_i^t))$  ( $i = 1, \dots, n$ ). Here  $x_i^t = (x_{i_1}^t, \dots, x_{i_p}^t)$  is the realization of random vectors  $X_i^t = (X_{i_1}^t, \dots, X_{i_p}^t)$  where  $X_{i_j}^t \sim \text{Uniform}(1, 10)$  such that  $\text{corr}(X_{i_j}^1, X_{i_j}^2) = \rho$  for all  $i \in \{1, \dots, n\}$ ,  $j \in \{1, \dots, p\}$ . The points  $(x_i^t, \psi^t(x_i^t))$  generated in this step serve as optimal points, i.e., hypothetically fully efficient DMUs. The parameter  $\rho$  predetermines the correlation of inputs of each DMU in two different time periods. The details on how to generate correlated random numbers are given in e-companion EC.3.
2. Generate  $\lambda(x_i^t, y_i^t | \Psi^t)$  for DMUs such that the efficiencies of the same DMU in different time periods are correlated according to  $\rho_\lambda$ . Formally, for each  $i \in \{1, \dots, n\}$ ,

$$\lambda(X_i^1, Y_i^1 | \Psi^1), \lambda(X_i^2, Y_i^2 | \Psi^2) \sim 1 + |\mathcal{N}(0, 0.25^2)|, \quad (\text{EC.24})$$

where  $\text{corr}(\lambda(X_i^1, Y_i^1 | \Psi^1), \lambda(X_i^2, Y_i^2 | \Psi^2)) \neq 0$  and depends on the pre-determined parameter  $\rho_\lambda$  mentioned above (see e-companion EC.3 for more details).

3. Use the generated efficiency scores to project the optimal points away from the corresponding frontiers to obtain the set  $\{(x_i^t, y_i^t)\}_{i \in \{1, \dots, n\}, t \in \{1, 2\}}$  where  $y_i^t = \psi^t(x_i^t) / \lambda(x_i^t, y_i^t | \Psi^t)$ , newly generated in each Monte Carlo trial. Note that we project the optimal points from the frontiers of  $\Psi^t$ , not the conical hull  $\mathcal{C}(\Psi^t)$ .

It is important to highlight that as  $q = 1$ , the vectors of output prices are scalars and they cancel out in calculations. As such, we set output prices to be unity in our Monte Carlo experiments, i.e.,  $w^1 = w^2 = 1$ . The summary of parameters used in our Monte Carlo experiments is presented in Table EC.1 below. In addition, we provide graphical illustrations of production frontiers in the two and three dimensional spaces in Figure EC.1.

**Table EC.1** Summary of experiment parameters.

| Parameters                                                                                  | Value                          |
|---------------------------------------------------------------------------------------------|--------------------------------|
| Number of Monte Carlo trials in each experiment ( $MC$ )                                    | 1000                           |
| Number of iterations in estimating the bias ( $L$ )                                         | 10                             |
| Level of significance ( $\alpha$ )                                                          | 0.01, 0.05, 0.10               |
| Sample size ( $n$ )                                                                         | 10, 20, 50, 100, 500, 1000     |
| Number of inputs ( $p$ )                                                                    | 1, 2, 3, 4                     |
| Parameter controlling deviation from the null hypothesis ( $\delta$ )                       | 0.00, 0.01, 0.02, 0.03, 0.04   |
| Parameter controlling correlation of inputs in periods 1 and 2 ( $\rho$ )                   | 0.5                            |
| Parameter controlling correlation of efficiencies in periods 1 and 2 ( $\rho_\lambda$ )     | 0.5                            |
| Distribution of the input variables                                                         | Uniform(1,10)                  |
| Distribution of efficiency                                                                  | $1 +  \mathcal{N}(0, 0.25^2) $ |
| Exponents of the production frontier function in period 1 ( $\beta_1^1, \dots, \beta_p^1$ ) |                                |
| $p = 1$                                                                                     | 0.5                            |
| $p = 2$                                                                                     | (0.3, 0.4)                     |
| $p = 3$                                                                                     | (0.1, 0.2, 0.3)                |
| $p = 4$                                                                                     | (0.1, 0.15, 0.2, 0.25)         |

$\Upsilon^1 = 1$ ,  $\Upsilon^2 = \Upsilon^1 + \delta$ ;  $b_i^t = 1$  ( $i = 1, \dots, p$ ;  $t = 1, 2$ );  $\beta_i^2 = \beta_i^1 + \delta$  ( $i = 1, \dots, p$ ); number of output  $q = 1$ .

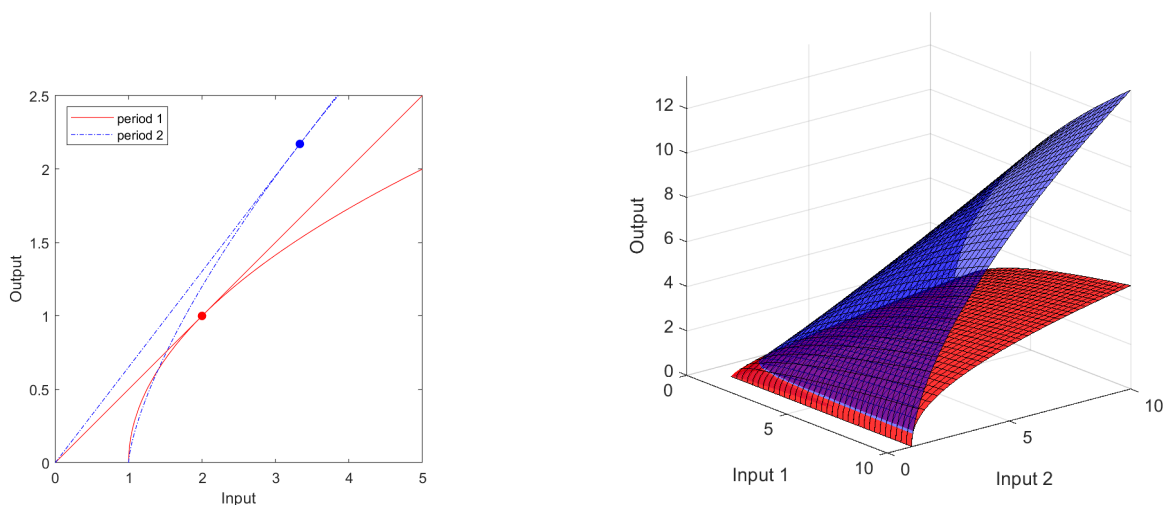

(a) One input one output

(b) Two inputs one output

**Figure EC.1** Production frontiers used in Monte Carlo experiments. Periods 1 and 2 are illustrated by red and blue curves/surfaces, respectively. The parameter  $\delta$  representing the difference between two time periods is set to be 0.2.

### EC.3.2. Simulation results

As can be seen in Table EC.1, we conduct 120 Monte Carlo experiments, each including 1000 trials ( $MC = 1000$ ) and corresponding to a combination of  $n$ ,  $p$  and  $\delta$ . (To sense the intensity of these simulations, we note that on a machine with 3.3GHz Intel Core i5-6600 CPU, 8GB RAM

and MATLAB<sup>®</sup>R2018b, the runtime of one trial corresponding to the scenario where  $p = 4$ ,  $n = 1000$ ,  $\delta = 0.04$  was about 7 minutes and 58 minutes for  $L = 10$  and  $L = 100$ , respectively.) The rejection rates for testing for productivity change and the estimated coverage of confidence intervals corresponding to  $p = 1, 2, 3, 4$  are reported in Sections EC.3.3, EC.3.4, EC.3.5, EC.3.6, respectively. In order to obtain the true values of  $\xi$  for evaluating the coverages of confidence intervals, we conduct prior Monte Carlo simulations of  $n = 10 \times 10^6$  observations without DEA estimation (see e-companion EC.3.8 for more details).

We focus on analyzing the performance of statistical inferences based on the following types of confidence intervals:

- (i) Using the “naive” standard central limit theorems, i.e., using the confidence interval (83) with unobserved elements being replaced by their respective DEA estimates.
- (ii) Using Theorem 8 for  $\kappa \geq 1/2$  ( $p + q = 2, 3$ ), i.e., confidence interval (64).
- (iii) Using Theorem 8 for  $\kappa < 1/2$  ( $p + q = 4, 5, 6 \dots$ ), i.e., confidence interval (65).
- (iv) Using confidence interval (68), the re-centered version of (65) as discussed in Remark 4.

For convenience, we will refer to types (i)–(iv) as “ST”, “CL1”, “CL2”, “RC2”, respectively.

In general, the simulation results support our newly developed theory. Regarding the hypothesis testing, given a sample size, the rejection rates increase as the parameter  $\delta$ , representing departure from the null hypothesis, increases. Moreover, for  $\delta = 0$ , the rejection rates (now representing the estimated size of the test) generally tend to approximate the nominal size (i.e., the respective value of  $\alpha$ ) as the sample size increases. Especially, the rejection rates for  $\delta = 0$  corresponding to the re-centered confidence intervals RC2 converge to zero as  $n$  increases regardless of the values of the nominal size of the test  $\alpha$ , confirming our Remark 3 in Section 7. Meanwhile, for  $\delta \neq 0$ , the rejection rates (now representing the estimated power of the test) increase toward unity as the sample size increases, and especially, the bigger values of  $n$  show faster convergence to unity.

With regard to the performance of confidence intervals, given a value of  $\delta$ , when the sample size increases, the estimated coverage shows an upward trend to approximate the respective nominal

coverage  $1 - \alpha$ . Similar to KSW2021, the re-centered confidence intervals RC2 show greater coverage, which also converges to 1 rather than the nominal  $1 - \alpha$ , although they have the same width as the confidence intervals CL2. This verifies our Remark 3 in Section 7.

Furthermore, it can be seen that the performance of developed statistical inferences is quite impressive even with small sample sizes such as  $n = 10$ , e.g., the estimated coverage for  $\xi$  using confidence intervals CL1 when  $p = 2, \alpha = 0.05, \delta = 0$  is 0.794.

The Monte Carlo evidence here also confirms our Remark 4 mentioned in Section 7. Indeed, when  $\kappa = 2/5$  (i.e.,  $p = 3, q = 1$ ), the confidence intervals CL2 generally outperform the corresponding CL1 in terms of the size of the test and coverages (see Tables EC.7). Note that, on the contrary, the inferences CL1 perform better than the inferences CL2 in terms of the power of the test. A possible explanation might be due to the trade-off between the size and power of the test, similar to KSW2021.

Interestingly, our Monte Carlo evidence shows that the naive standard approach ST performs quite well in low dimensions (i.e., the number of inputs and outputs  $p + q$ ) where  $\kappa \geq 1/2$  (i.e.,  $p = 1, q = 1$  and  $p = 2, q = 1$ ), illustrated by the fact that its performance is quite similar to that of the CL1 there. Comparing the performance of ST to that of CL2 when  $\kappa = 2/5$  and  $\kappa = 1/3$  (i.e.,  $p = 3, q = 1$  and  $p = 4, q = 1$ ), we recognize that they are relatively analogous for small values of  $\delta$  such as 0 or 0.01, while for  $\delta = 0.04$ , the latter slightly outperforms the former in terms of estimated coverage of confidence intervals when  $n = 1000$ . These findings support the conjecture in Remarks 5 and 6 in Section 7 that in some peculiar cases, the bias might be tiny (or even cancel out in some more special symmetric cases such as  $\delta = 0$ ). Also, note that the re-centered approach, RC2, typically gave higher coverage than the ST approach, while having the same width of the estimated confidence intervals.

**EC.3.3. Simulation results when  $p = 1, q = 1$** **Table EC.2** Rejection rates for test for aggregate productivity change using  $\xi$  when  $p = 1, q = 1$ .

| $n$  | $\delta$ | $\alpha = 0.10$ |       | $\alpha = 0.05$ |       | $\alpha = 0.01$ |       |
|------|----------|-----------------|-------|-----------------|-------|-----------------|-------|
|      |          | ST              | CL1   | ST              | CL1   | ST              | CL1   |
| 10   | 0.00     | 0.158           | 0.161 | 0.100           | 0.104 | 0.039           | 0.034 |
|      | 0.01     | 0.169           | 0.182 | 0.110           | 0.112 | 0.043           | 0.050 |
|      | 0.02     | 0.273           | 0.286 | 0.189           | 0.199 | 0.094           | 0.100 |
|      | 0.03     | 0.366           | 0.371 | 0.276           | 0.281 | 0.144           | 0.142 |
|      | 0.04     | 0.558           | 0.564 | 0.443           | 0.443 | 0.269           | 0.266 |
| 20   | 0.00     | 0.130           | 0.134 | 0.080           | 0.080 | 0.025           | 0.023 |
|      | 0.01     | 0.192           | 0.192 | 0.117           | 0.119 | 0.046           | 0.046 |
|      | 0.02     | 0.354           | 0.348 | 0.257           | 0.253 | 0.138           | 0.138 |
|      | 0.03     | 0.558           | 0.558 | 0.450           | 0.453 | 0.256           | 0.253 |
|      | 0.04     | 0.701           | 0.708 | 0.605           | 0.603 | 0.435           | 0.427 |
| 50   | 0.00     | 0.122           | 0.125 | 0.061           | 0.063 | 0.013           | 0.012 |
|      | 0.01     | 0.255           | 0.254 | 0.163           | 0.160 | 0.065           | 0.063 |
|      | 0.02     | 0.557           | 0.552 | 0.435           | 0.426 | 0.247           | 0.241 |
|      | 0.03     | 0.833           | 0.834 | 0.754           | 0.752 | 0.558           | 0.556 |
|      | 0.04     | 0.970           | 0.971 | 0.950           | 0.948 | 0.870           | 0.864 |
| 100  | 0.00     | 0.108           | 0.105 | 0.058           | 0.058 | 0.014           | 0.013 |
|      | 0.01     | 0.356           | 0.351 | 0.254           | 0.254 | 0.116           | 0.112 |
|      | 0.02     | 0.798           | 0.792 | 0.705           | 0.702 | 0.480           | 0.488 |
|      | 0.03     | 0.978           | 0.977 | 0.963           | 0.961 | 0.888           | 0.888 |
|      | 0.04     | 1.000           | 1.000 | 1.000           | 1.000 | 0.994           | 0.995 |
| 500  | 0.00     | 0.113           | 0.113 | 0.060           | 0.060 | 0.013           | 0.012 |
|      | 0.01     | 0.878           | 0.878 | 0.807           | 0.808 | 0.589           | 0.590 |
|      | 0.02     | 1.000           | 1.000 | 1.000           | 1.000 | 0.999           | 0.999 |
|      | 0.03     | 1.000           | 1.000 | 1.000           | 1.000 | 1.000           | 1.000 |
|      | 0.04     | 1.000           | 1.000 | 1.000           | 1.000 | 1.000           | 1.000 |
| 1000 | 0.00     | 0.130           | 0.127 | 0.069           | 0.069 | 0.008           | 0.008 |
|      | 0.01     | 0.984           | 0.985 | 0.961           | 0.960 | 0.902           | 0.902 |
|      | 0.02     | 1.000           | 1.000 | 1.000           | 1.000 | 1.000           | 1.000 |
|      | 0.03     | 1.000           | 1.000 | 1.000           | 1.000 | 1.000           | 1.000 |
|      | 0.04     | 1.000           | 1.000 | 1.000           | 1.000 | 1.000           | 1.000 |

 $MC = 1000, L = 10, \rho = \rho_\lambda = 0.5.$

**Table EC.3** Coverage of confidence intervals for  $\xi$  when  $p = 1, q = 1$ .

| $\delta$ | $n$  | $\alpha = 0.10$ |       | $\alpha = 0.05$ |       | $\alpha = 0.01$ |       |
|----------|------|-----------------|-------|-----------------|-------|-----------------|-------|
|          |      | ST              | CL1   | ST              | CL1   | ST              | CL1   |
| 0.00     | 10   | 0.842           | 0.839 | 0.900           | 0.896 | 0.961           | 0.966 |
|          | 20   | 0.870           | 0.866 | 0.920           | 0.920 | 0.975           | 0.977 |
|          | 50   | 0.878           | 0.875 | 0.939           | 0.937 | 0.987           | 0.988 |
|          | 100  | 0.892           | 0.895 | 0.942           | 0.942 | 0.986           | 0.987 |
|          | 500  | 0.887           | 0.887 | 0.940           | 0.940 | 0.987           | 0.988 |
|          | 1000 | 0.870           | 0.873 | 0.931           | 0.931 | 0.992           | 0.992 |
| 0.01     | 10   | 0.851           | 0.848 | 0.912           | 0.905 | 0.968           | 0.967 |
|          | 20   | 0.871           | 0.869 | 0.926           | 0.923 | 0.978           | 0.976 |
|          | 50   | 0.890           | 0.896 | 0.936           | 0.938 | 0.983           | 0.985 |
|          | 100  | 0.877           | 0.879 | 0.933           | 0.934 | 0.989           | 0.988 |
|          | 500  | 0.897           | 0.898 | 0.943           | 0.943 | 0.993           | 0.993 |
|          | 1000 | 0.887           | 0.887 | 0.936           | 0.936 | 0.991           | 0.991 |
| 0.02     | 10   | 0.834           | 0.828 | 0.896           | 0.887 | 0.960           | 0.956 |
|          | 20   | 0.830           | 0.831 | 0.894           | 0.887 | 0.966           | 0.963 |
|          | 50   | 0.883           | 0.885 | 0.950           | 0.945 | 0.992           | 0.992 |
|          | 100  | 0.902           | 0.897 | 0.950           | 0.951 | 0.987           | 0.985 |
|          | 500  | 0.918           | 0.921 | 0.961           | 0.961 | 0.993           | 0.993 |
|          | 1000 | 0.889           | 0.889 | 0.949           | 0.949 | 0.990           | 0.991 |
| 0.03     | 10   | 0.847           | 0.841 | 0.904           | 0.903 | 0.962           | 0.961 |
|          | 20   | 0.863           | 0.858 | 0.920           | 0.917 | 0.977           | 0.976 |
|          | 50   | 0.883           | 0.883 | 0.942           | 0.938 | 0.981           | 0.981 |
|          | 100  | 0.893           | 0.892 | 0.946           | 0.949 | 0.987           | 0.986 |
|          | 500  | 0.912           | 0.909 | 0.954           | 0.954 | 0.988           | 0.989 |
|          | 1000 | 0.919           | 0.922 | 0.953           | 0.953 | 0.991           | 0.991 |
| 0.04     | 10   | 0.861           | 0.851 | 0.894           | 0.893 | 0.960           | 0.950 |
|          | 20   | 0.847           | 0.852 | 0.910           | 0.905 | 0.965           | 0.965 |
|          | 50   | 0.893           | 0.891 | 0.938           | 0.937 | 0.984           | 0.985 |
|          | 100  | 0.898           | 0.895 | 0.947           | 0.946 | 0.988           | 0.988 |
|          | 500  | 0.897           | 0.895 | 0.939           | 0.940 | 0.986           | 0.987 |
|          | 1000 | 0.894           | 0.893 | 0.942           | 0.942 | 0.991           | 0.991 |

 $MC = 1000, L = 10, \rho = \rho_\lambda = 0.5$ .

**EC.3.4. Simulation results when  $p = 2, q = 1$** **Table EC.4** Rejection rates for test for aggregate productivity change using  $\xi$  when  $p = 2, q = 1$ .

| $n$  | $\delta$ | $\alpha = 0.10$ |       | $\alpha = 0.05$ |       | $\alpha = 0.01$ |       |
|------|----------|-----------------|-------|-----------------|-------|-----------------|-------|
|      |          | ST              | CL1   | ST              | CL1   | ST              | CL1   |
| 10   | 0.00     | 0.215           | 0.290 | 0.136           | 0.206 | 0.050           | 0.114 |
|      | 0.01     | 0.311           | 0.367 | 0.224           | 0.294 | 0.119           | 0.171 |
|      | 0.02     | 0.584           | 0.566 | 0.471           | 0.482 | 0.322           | 0.347 |
|      | 0.03     | 0.799           | 0.769 | 0.707           | 0.698 | 0.543           | 0.550 |
|      | 0.04     | 0.928           | 0.878 | 0.889           | 0.849 | 0.775           | 0.749 |
| 20   | 0.00     | 0.142           | 0.186 | 0.087           | 0.115 | 0.030           | 0.036 |
|      | 0.01     | 0.382           | 0.392 | 0.288           | 0.310 | 0.133           | 0.154 |
|      | 0.02     | 0.749           | 0.735 | 0.672           | 0.642 | 0.451           | 0.464 |
|      | 0.03     | 0.960           | 0.950 | 0.933           | 0.926 | 0.827           | 0.818 |
|      | 0.04     | 0.996           | 0.992 | 0.989           | 0.981 | 0.956           | 0.957 |
| 50   | 0.00     | 0.100           | 0.109 | 0.051           | 0.056 | 0.009           | 0.012 |
|      | 0.01     | 0.589           | 0.584 | 0.462           | 0.472 | 0.252           | 0.278 |
|      | 0.02     | 0.975           | 0.976 | 0.953           | 0.952 | 0.861           | 0.865 |
|      | 0.03     | 0.999           | 0.999 | 0.998           | 0.998 | 0.993           | 0.993 |
|      | 0.04     | 1.000           | 1.000 | 1.000           | 1.000 | 1.000           | 1.000 |
| 100  | 0.00     | 0.106           | 0.112 | 0.053           | 0.062 | 0.016           | 0.018 |
|      | 0.01     | 0.845           | 0.844 | 0.757           | 0.763 | 0.569           | 0.554 |
|      | 0.02     | 1.000           | 0.999 | 0.999           | 0.999 | 0.994           | 0.994 |
|      | 0.03     | 1.000           | 1.000 | 1.000           | 1.000 | 1.000           | 1.000 |
|      | 0.04     | 1.000           | 1.000 | 1.000           | 1.000 | 1.000           | 1.000 |
| 500  | 0.00     | 0.106           | 0.106 | 0.052           | 0.052 | 0.009           | 0.008 |
|      | 0.01     | 1.000           | 1.000 | 1.000           | 1.000 | 1.000           | 1.000 |
|      | 0.02     | 1.000           | 1.000 | 1.000           | 1.000 | 1.000           | 1.000 |
|      | 0.03     | 1.000           | 1.000 | 1.000           | 1.000 | 1.000           | 1.000 |
|      | 0.04     | 1.000           | 1.000 | 1.000           | 1.000 | 1.000           | 1.000 |
| 1000 | 0.00     | 0.097           | 0.097 | 0.053           | 0.054 | 0.015           | 0.015 |
|      | 0.01     | 1.000           | 1.000 | 1.000           | 1.000 | 1.000           | 1.000 |
|      | 0.02     | 1.000           | 1.000 | 1.000           | 1.000 | 1.000           | 1.000 |
|      | 0.03     | 1.000           | 1.000 | 1.000           | 1.000 | 1.000           | 1.000 |
|      | 0.04     | 1.000           | 1.000 | 1.000           | 1.000 | 1.000           | 1.000 |

 $MC = 1000, L = 10, \rho = \rho_\lambda = 0.5.$

**Table EC.5** Coverage of confidence intervals for  $\xi$  when  $p = 2, q = 1$ .

| $\delta$ | $n$  | $\alpha = 0.10$ |       | $\alpha = 0.05$ |       | $\alpha = 0.01$ |       |
|----------|------|-----------------|-------|-----------------|-------|-----------------|-------|
|          |      | ST              | CL1   | ST              | CL1   | ST              | CL1   |
| 0.00     | 10   | 0.785           | 0.710 | 0.864           | 0.794 | 0.950           | 0.886 |
|          | 20   | 0.858           | 0.814 | 0.913           | 0.885 | 0.970           | 0.964 |
|          | 50   | 0.900           | 0.891 | 0.949           | 0.944 | 0.991           | 0.988 |
|          | 100  | 0.894           | 0.888 | 0.947           | 0.938 | 0.984           | 0.982 |
|          | 500  | 0.894           | 0.894 | 0.948           | 0.948 | 0.991           | 0.992 |
|          | 1000 | 0.903           | 0.903 | 0.947           | 0.946 | 0.985           | 0.985 |
| 0.01     | 10   | 0.794           | 0.709 | 0.855           | 0.800 | 0.939           | 0.886 |
|          | 20   | 0.849           | 0.813 | 0.914           | 0.883 | 0.971           | 0.955 |
|          | 50   | 0.880           | 0.869 | 0.937           | 0.933 | 0.984           | 0.986 |
|          | 100  | 0.878           | 0.867 | 0.934           | 0.938 | 0.990           | 0.988 |
|          | 500  | 0.900           | 0.895 | 0.946           | 0.946 | 0.984           | 0.983 |
|          | 1000 | 0.897           | 0.897 | 0.949           | 0.945 | 0.988           | 0.987 |
| 0.02     | 10   | 0.787           | 0.702 | 0.859           | 0.790 | 0.931           | 0.892 |
|          | 20   | 0.852           | 0.825 | 0.917           | 0.896 | 0.969           | 0.960 |
|          | 50   | 0.880           | 0.879 | 0.939           | 0.943 | 0.982           | 0.976 |
|          | 100  | 0.895           | 0.888 | 0.950           | 0.949 | 0.991           | 0.990 |
|          | 500  | 0.908           | 0.906 | 0.949           | 0.948 | 0.985           | 0.982 |
|          | 1000 | 0.894           | 0.895 | 0.946           | 0.945 | 0.989           | 0.988 |
| 0.03     | 10   | 0.812           | 0.737 | 0.882           | 0.802 | 0.951           | 0.905 |
|          | 20   | 0.848           | 0.813 | 0.905           | 0.877 | 0.969           | 0.956 |
|          | 50   | 0.904           | 0.888 | 0.953           | 0.938 | 0.988           | 0.980 |
|          | 100  | 0.906           | 0.897 | 0.953           | 0.950 | 0.988           | 0.984 |
|          | 500  | 0.882           | 0.883 | 0.947           | 0.949 | 0.992           | 0.991 |
|          | 1000 | 0.914           | 0.908 | 0.963           | 0.964 | 0.994           | 0.993 |
| 0.04     | 10   | 0.812           | 0.723 | 0.865           | 0.794 | 0.945           | 0.897 |
|          | 20   | 0.845           | 0.835 | 0.916           | 0.895 | 0.974           | 0.966 |
|          | 50   | 0.878           | 0.859 | 0.935           | 0.920 | 0.984           | 0.982 |
|          | 100  | 0.897           | 0.890 | 0.952           | 0.948 | 0.992           | 0.990 |
|          | 500  | 0.908           | 0.907 | 0.944           | 0.950 | 0.986           | 0.991 |
|          | 1000 | 0.909           | 0.899 | 0.963           | 0.958 | 0.994           | 0.993 |

 $MC = 1000, L = 10, \rho = \rho_\lambda = 0.5$ .

**EC.3.5. Simulation results when  $p = 3, q = 1$** **Table EC.6** Rejection rates for test for aggregate productivity change using  $\xi$  when  $p = 3, q = 1$ .

| $n$  | $\delta$ | $\alpha = 0.10$ |       |       |       | $\alpha = 0.05$ |       |       |       | $\alpha = 0.01$ |       |       |       |
|------|----------|-----------------|-------|-------|-------|-----------------|-------|-------|-------|-----------------|-------|-------|-------|
|      |          | ST              | CL1   | CL2   | RC2   | ST              | CL1   | CL2   | RC2   | ST              | CL1   | CL2   | RC2   |
| 10   | 0.00     | 0.235           | 0.364 | 0.333 | 0.254 | 0.171           | 0.278 | 0.240 | 0.189 | 0.078           | 0.172 | 0.132 | 0.099 |
|      | 0.01     | 0.365           | 0.470 | 0.394 | 0.350 | 0.273           | 0.378 | 0.318 | 0.265 | 0.170           | 0.249 | 0.185 | 0.145 |
|      | 0.02     | 0.648           | 0.648 | 0.551 | 0.546 | 0.567           | 0.569 | 0.472 | 0.471 | 0.394           | 0.455 | 0.348 | 0.312 |
|      | 0.03     | 0.878           | 0.816 | 0.713 | 0.750 | 0.827           | 0.765 | 0.654 | 0.674 | 0.681           | 0.648 | 0.514 | 0.511 |
|      | 0.04     | 0.967           | 0.914 | 0.852 | 0.880 | 0.946           | 0.892 | 0.799 | 0.822 | 0.860           | 0.811 | 0.688 | 0.701 |
| 20   | 0.00     | 0.196           | 0.256 | 0.237 | 0.143 | 0.126           | 0.185 | 0.160 | 0.087 | 0.046           | 0.097 | 0.054 | 0.031 |
|      | 0.01     | 0.460           | 0.491 | 0.371 | 0.316 | 0.360           | 0.391 | 0.273 | 0.219 | 0.203           | 0.236 | 0.149 | 0.099 |
|      | 0.02     | 0.830           | 0.784 | 0.621 | 0.662 | 0.755           | 0.727 | 0.539 | 0.562 | 0.575           | 0.584 | 0.380 | 0.359 |
|      | 0.03     | 0.988           | 0.965 | 0.872 | 0.913 | 0.977           | 0.942 | 0.822 | 0.857 | 0.904           | 0.873 | 0.667 | 0.702 |
|      | 0.04     | 1.000           | 1.000 | 0.976 | 0.992 | 1.000           | 0.995 | 0.961 | 0.977 | 0.993           | 0.980 | 0.900 | 0.929 |
| 50   | 0.00     | 0.120           | 0.152 | 0.142 | 0.045 | 0.078           | 0.090 | 0.078 | 0.018 | 0.019           | 0.032 | 0.021 | 0.002 |
|      | 0.01     | 0.690           | 0.697 | 0.439 | 0.424 | 0.594           | 0.588 | 0.348 | 0.302 | 0.391           | 0.386 | 0.169 | 0.109 |
|      | 0.02     | 0.997           | 0.995 | 0.902 | 0.965 | 0.994           | 0.990 | 0.863 | 0.925 | 0.953           | 0.955 | 0.716 | 0.764 |
|      | 0.03     | 1.000           | 1.000 | 0.996 | 1.000 | 1.000           | 1.000 | 0.987 | 1.000 | 1.000           | 1.000 | 0.964 | 0.986 |
|      | 0.04     | 1.000           | 1.000 | 0.999 | 1.000 | 1.000           | 1.000 | 0.999 | 1.000 | 1.000           | 1.000 | 0.998 | 1.000 |
| 100  | 0.00     | 0.123           | 0.135 | 0.120 | 0.022 | 0.068           | 0.069 | 0.056 | 0.006 | 0.013           | 0.022 | 0.011 | 0.001 |
|      | 0.01     | 0.915           | 0.917 | 0.655 | 0.722 | 0.879           | 0.868 | 0.538 | 0.542 | 0.730           | 0.732 | 0.309 | 0.219 |
|      | 0.02     | 1.000           | 1.000 | 0.989 | 0.999 | 1.000           | 1.000 | 0.978 | 0.998 | 0.999           | 0.999 | 0.919 | 0.985 |
|      | 0.03     | 1.000           | 1.000 | 1.000 | 1.000 | 1.000           | 1.000 | 1.000 | 1.000 | 1.000           | 1.000 | 1.000 | 1.000 |
|      | 0.04     | 1.000           | 1.000 | 1.000 | 1.000 | 1.000           | 1.000 | 1.000 | 1.000 | 1.000           | 1.000 | 1.000 | 1.000 |
| 500  | 0.00     | 0.115           | 0.126 | 0.107 | 0.005 | 0.062           | 0.069 | 0.052 | 0.000 | 0.016           | 0.018 | 0.012 | 0.000 |
|      | 0.01     | 1.000           | 1.000 | 0.994 | 1.000 | 1.000           | 1.000 | 0.981 | 1.000 | 1.000           | 1.000 | 0.915 | 0.987 |
|      | 0.02     | 1.000           | 1.000 | 1.000 | 1.000 | 1.000           | 1.000 | 1.000 | 1.000 | 1.000           | 1.000 | 1.000 | 1.000 |
|      | 0.03     | 1.000           | 1.000 | 1.000 | 1.000 | 1.000           | 1.000 | 1.000 | 1.000 | 1.000           | 1.000 | 1.000 | 1.000 |
|      | 0.04     | 1.000           | 1.000 | 1.000 | 1.000 | 1.000           | 1.000 | 1.000 | 1.000 | 1.000           | 1.000 | 1.000 | 1.000 |
| 1000 | 0.00     | 0.113           | 0.115 | 0.103 | 0.002 | 0.052           | 0.058 | 0.052 | 0.000 | 0.015           | 0.014 | 0.008 | 0.000 |
|      | 0.01     | 1.000           | 1.000 | 1.000 | 1.000 | 1.000           | 1.000 | 0.999 | 1.000 | 1.000           | 1.000 | 0.995 | 1.000 |
|      | 0.02     | 1.000           | 1.000 | 1.000 | 1.000 | 1.000           | 1.000 | 1.000 | 1.000 | 1.000           | 1.000 | 1.000 | 1.000 |
|      | 0.03     | 1.000           | 1.000 | 1.000 | 1.000 | 1.000           | 1.000 | 1.000 | 1.000 | 1.000           | 1.000 | 1.000 | 1.000 |
|      | 0.04     | 1.000           | 1.000 | 1.000 | 1.000 | 1.000           | 1.000 | 1.000 | 1.000 | 1.000           | 1.000 | 1.000 | 1.000 |

 $MC = 1000, L = 10, \rho = \rho_\lambda = 0.5.$

**Table EC.7** Coverage of confidence intervals for  $\xi$  when  $p = 3, q = 1$ .

| $\delta$ | $n$  | $\alpha = 0.10$ |       |       |       | $\alpha = 0.05$ |       |       |       | $\alpha = 0.01$ |       |       |       |
|----------|------|-----------------|-------|-------|-------|-----------------|-------|-------|-------|-----------------|-------|-------|-------|
|          |      | ST              | CL1   | CL2   | RC2   | ST              | CL1   | CL2   | RC2   | ST              | CL1   | CL2   | RC2   |
| 0.00     | 10   | 0.765           | 0.636 | 0.667 | 0.746 | 0.829           | 0.722 | 0.760 | 0.811 | 0.922           | 0.828 | 0.868 | 0.901 |
|          | 20   | 0.804           | 0.744 | 0.763 | 0.857 | 0.874           | 0.815 | 0.840 | 0.913 | 0.954           | 0.903 | 0.946 | 0.969 |
|          | 50   | 0.880           | 0.848 | 0.858 | 0.955 | 0.922           | 0.910 | 0.922 | 0.982 | 0.981           | 0.968 | 0.979 | 0.998 |
|          | 100  | 0.877           | 0.865 | 0.880 | 0.978 | 0.932           | 0.931 | 0.944 | 0.994 | 0.987           | 0.978 | 0.989 | 0.999 |
|          | 500  | 0.885           | 0.874 | 0.893 | 0.995 | 0.938           | 0.931 | 0.948 | 1.000 | 0.984           | 0.982 | 0.988 | 1.000 |
|          | 1000 | 0.887           | 0.885 | 0.897 | 0.998 | 0.948           | 0.942 | 0.948 | 1.000 | 0.985           | 0.986 | 0.992 | 1.000 |
| 0.01     | 10   | 0.778           | 0.650 | 0.675 | 0.759 | 0.851           | 0.731 | 0.744 | 0.811 | 0.939           | 0.828 | 0.859 | 0.906 |
|          | 20   | 0.810           | 0.732 | 0.781 | 0.850 | 0.875           | 0.799 | 0.851 | 0.915 | 0.959           | 0.908 | 0.944 | 0.968 |
|          | 50   | 0.864           | 0.831 | 0.863 | 0.954 | 0.913           | 0.900 | 0.919 | 0.975 | 0.969           | 0.965 | 0.979 | 0.999 |
|          | 100  | 0.882           | 0.868 | 0.886 | 0.980 | 0.932           | 0.917 | 0.939 | 0.991 | 0.988           | 0.976 | 0.990 | 1.000 |
|          | 500  | 0.902           | 0.893 | 0.908 | 0.998 | 0.937           | 0.934 | 0.956 | 1.000 | 0.989           | 0.984 | 0.994 | 1.000 |
|          | 1000 | 0.888           | 0.883 | 0.892 | 1.000 | 0.950           | 0.937 | 0.951 | 1.000 | 0.991           | 0.988 | 0.988 | 1.000 |
| 0.02     | 10   | 0.768           | 0.615 | 0.640 | 0.710 | 0.838           | 0.685 | 0.728 | 0.782 | 0.933           | 0.796 | 0.864 | 0.884 |
|          | 20   | 0.805           | 0.736 | 0.785 | 0.866 | 0.889           | 0.816 | 0.857 | 0.922 | 0.965           | 0.917 | 0.953 | 0.975 |
|          | 50   | 0.860           | 0.840 | 0.860 | 0.961 | 0.923           | 0.903 | 0.917 | 0.986 | 0.987           | 0.969 | 0.979 | 0.998 |
|          | 100  | 0.886           | 0.881 | 0.880 | 0.985 | 0.940           | 0.929 | 0.941 | 0.993 | 0.983           | 0.984 | 0.983 | 1.000 |
|          | 500  | 0.896           | 0.897 | 0.916 | 0.998 | 0.946           | 0.937 | 0.951 | 1.000 | 0.993           | 0.991 | 0.988 | 1.000 |
|          | 1000 | 0.895           | 0.900 | 0.883 | 0.999 | 0.960           | 0.952 | 0.931 | 1.000 | 0.991           | 0.990 | 0.992 | 1.000 |
| 0.03     | 10   | 0.779           | 0.636 | 0.702 | 0.736 | 0.846           | 0.708 | 0.774 | 0.809 | 0.932           | 0.820 | 0.874 | 0.897 |
|          | 20   | 0.820           | 0.742 | 0.786 | 0.849 | 0.881           | 0.807 | 0.867 | 0.916 | 0.969           | 0.904 | 0.943 | 0.970 |
|          | 50   | 0.842           | 0.832 | 0.859 | 0.947 | 0.927           | 0.896 | 0.927 | 0.982 | 0.976           | 0.961 | 0.978 | 0.996 |
|          | 100  | 0.860           | 0.842 | 0.885 | 0.979 | 0.921           | 0.914 | 0.949 | 0.994 | 0.980           | 0.979 | 0.985 | 0.999 |
|          | 500  | 0.889           | 0.885 | 0.913 | 0.997 | 0.940           | 0.933 | 0.950 | 1.000 | 0.987           | 0.987 | 0.993 | 1.000 |
|          | 1000 | 0.900           | 0.894 | 0.897 | 1.000 | 0.949           | 0.952 | 0.941 | 1.000 | 0.994           | 0.995 | 0.989 | 1.000 |
| 0.04     | 10   | 0.778           | 0.630 | 0.682 | 0.739 | 0.856           | 0.712 | 0.757 | 0.812 | 0.936           | 0.825 | 0.879 | 0.907 |
|          | 20   | 0.819           | 0.738 | 0.779 | 0.871 | 0.884           | 0.816 | 0.852 | 0.935 | 0.967           | 0.931 | 0.950 | 0.978 |
|          | 50   | 0.858           | 0.834 | 0.886 | 0.952 | 0.926           | 0.902 | 0.932 | 0.977 | 0.980           | 0.962 | 0.983 | 0.994 |
|          | 100  | 0.873           | 0.862 | 0.866 | 0.979 | 0.937           | 0.929 | 0.931 | 0.988 | 0.977           | 0.979 | 0.981 | 0.999 |
|          | 500  | 0.910           | 0.902 | 0.896 | 0.999 | 0.953           | 0.949 | 0.948 | 1.000 | 0.987           | 0.985 | 0.985 | 1.000 |
|          | 1000 | 0.906           | 0.907 | 0.913 | 0.999 | 0.946           | 0.949 | 0.960 | 0.999 | 0.992           | 0.992 | 0.993 | 1.000 |

$MC = 1000, L = 10, \rho = \rho_\lambda = 0.5$ .

**EC.3.6. Simulation results when  $p = 4, q = 1$** **Table EC.8** Rejection rates for test for aggregate productivity change using  $\xi$  when  $p = 4, q = 1$ .

| $n$  | $\delta$ | $\alpha = 0.10$ |       |       |       | $\alpha = 0.05$ |       |       |       | $\alpha = 0.01$ |       |       |       |
|------|----------|-----------------|-------|-------|-------|-----------------|-------|-------|-------|-----------------|-------|-------|-------|
|      |          | ST              | CL1   | CL2   | RC2   | ST              | CL1   | CL2   | RC2   | ST              | CL1   | CL2   | RC2   |
| 10   | 0.00     | 0.239           | 0.465 | 0.359 | 0.293 | 0.170           | 0.387 | 0.285 | 0.213 | 0.086           | 0.262 | 0.178 | 0.118 |
|      | 0.01     | 0.458           | 0.547 | 0.428 | 0.393 | 0.382           | 0.480 | 0.354 | 0.305 | 0.241           | 0.368 | 0.243 | 0.196 |
|      | 0.02     | 0.810           | 0.727 | 0.610 | 0.605 | 0.755           | 0.676 | 0.530 | 0.519 | 0.617           | 0.568 | 0.411 | 0.390 |
|      | 0.03     | 0.975           | 0.888 | 0.785 | 0.814 | 0.951           | 0.860 | 0.728 | 0.753 | 0.884           | 0.792 | 0.596 | 0.594 |
|      | 0.04     | 0.993           | 0.955 | 0.890 | 0.915 | 0.992           | 0.941 | 0.856 | 0.886 | 0.976           | 0.905 | 0.771 | 0.803 |
| 20   | 0.00     | 0.197           | 0.351 | 0.236 | 0.140 | 0.120           | 0.274 | 0.156 | 0.078 | 0.049           | 0.155 | 0.083 | 0.019 |
|      | 0.01     | 0.618           | 0.602 | 0.399 | 0.363 | 0.523           | 0.524 | 0.325 | 0.265 | 0.346           | 0.388 | 0.190 | 0.115 |
|      | 0.02     | 0.964           | 0.903 | 0.720 | 0.780 | 0.941           | 0.874 | 0.637 | 0.689 | 0.868           | 0.802 | 0.477 | 0.474 |
|      | 0.03     | 1.000           | 0.991 | 0.919 | 0.950 | 0.999           | 0.984 | 0.888 | 0.925 | 0.987           | 0.960 | 0.797 | 0.831 |
|      | 0.04     | 1.000           | 1.000 | 0.988 | 0.997 | 1.000           | 1.000 | 0.973 | 0.994 | 1.000           | 0.999 | 0.939 | 0.973 |
| 50   | 0.00     | 0.179           | 0.249 | 0.154 | 0.028 | 0.123           | 0.177 | 0.088 | 0.011 | 0.041           | 0.071 | 0.030 | 0.001 |
|      | 0.01     | 0.912           | 0.875 | 0.533 | 0.549 | 0.862           | 0.828 | 0.434 | 0.385 | 0.716           | 0.700 | 0.262 | 0.132 |
|      | 0.02     | 1.000           | 1.000 | 0.926 | 0.990 | 1.000           | 0.998 | 0.877 | 0.964 | 0.999           | 0.994 | 0.731 | 0.841 |
|      | 0.03     | 1.000           | 1.000 | 0.996 | 1.000 | 1.000           | 1.000 | 0.991 | 1.000 | 1.000           | 1.000 | 0.971 | 0.999 |
|      | 0.04     | 1.000           | 1.000 | 0.999 | 1.000 | 1.000           | 1.000 | 0.999 | 1.000 | 1.000           | 1.000 | 0.996 | 1.000 |
| 100  | 0.00     | 0.122           | 0.176 | 0.132 | 0.005 | 0.074           | 0.110 | 0.079 | 0.002 | 0.019           | 0.036 | 0.022 | 0.000 |
|      | 0.01     | 0.995           | 0.991 | 0.656 | 0.796 | 0.989           | 0.979 | 0.541 | 0.610 | 0.956           | 0.931 | 0.333 | 0.230 |
|      | 0.02     | 1.000           | 1.000 | 0.987 | 1.000 | 1.000           | 1.000 | 0.979 | 1.000 | 1.000           | 1.000 | 0.912 | 0.997 |
|      | 0.03     | 1.000           | 1.000 | 1.000 | 1.000 | 1.000           | 1.000 | 1.000 | 1.000 | 1.000           | 1.000 | 0.999 | 1.000 |
|      | 0.04     | 1.000           | 1.000 | 1.000 | 1.000 | 1.000           | 1.000 | 1.000 | 1.000 | 1.000           | 1.000 | 1.000 | 1.000 |
| 500  | 0.00     | 0.111           | 0.123 | 0.105 | 0.000 | 0.061           | 0.069 | 0.051 | 0.000 | 0.018           | 0.016 | 0.016 | 0.000 |
|      | 0.01     | 1.000           | 1.000 | 0.980 | 1.000 | 1.000           | 1.000 | 0.952 | 1.000 | 1.000           | 1.000 | 0.832 | 0.997 |
|      | 0.02     | 1.000           | 1.000 | 1.000 | 1.000 | 1.000           | 1.000 | 1.000 | 1.000 | 1.000           | 1.000 | 1.000 | 1.000 |
|      | 0.03     | 1.000           | 1.000 | 1.000 | 1.000 | 1.000           | 1.000 | 1.000 | 1.000 | 1.000           | 1.000 | 1.000 | 1.000 |
|      | 0.04     | 1.000           | 1.000 | 1.000 | 1.000 | 1.000           | 1.000 | 1.000 | 1.000 | 1.000           | 1.000 | 1.000 | 1.000 |
| 1000 | 0.00     | 0.106           | 0.119 | 0.103 | 0.000 | 0.044           | 0.056 | 0.052 | 0.000 | 0.010           | 0.009 | 0.009 | 0.000 |
|      | 0.01     | 1.000           | 1.000 | 0.999 | 1.000 | 1.000           | 1.000 | 0.999 | 1.000 | 1.000           | 1.000 | 0.984 | 1.000 |
|      | 0.02     | 1.000           | 1.000 | 1.000 | 1.000 | 1.000           | 1.000 | 1.000 | 1.000 | 1.000           | 1.000 | 1.000 | 1.000 |
|      | 0.03     | 1.000           | 1.000 | 1.000 | 1.000 | 1.000           | 1.000 | 1.000 | 1.000 | 1.000           | 1.000 | 1.000 | 1.000 |
|      | 0.04     | 1.000           | 1.000 | 1.000 | 1.000 | 1.000           | 1.000 | 1.000 | 1.000 | 1.000           | 1.000 | 1.000 | 1.000 |

 $MC = 1000, L = 10, \rho = \rho_\lambda = 0.5.$

**Table EC.9** Coverage of confidence intervals for  $\xi$  when  $p = 4, q = 1$ .

| $\delta$ | $n$  | $\alpha = 0.10$ |       |       |       | $\alpha = 0.05$ |       |       |       | $\alpha = 0.01$ |       |       |       |
|----------|------|-----------------|-------|-------|-------|-----------------|-------|-------|-------|-----------------|-------|-------|-------|
|          |      | ST              | CL1   | CL2   | RC2   | ST              | CL1   | CL2   | RC2   | ST              | CL1   | CL2   | RC2   |
| 0.00     | 10   | 0.761           | 0.535 | 0.641 | 0.707 | 0.830           | 0.613 | 0.715 | 0.787 | 0.914           | 0.738 | 0.822 | 0.882 |
|          | 20   | 0.803           | 0.649 | 0.764 | 0.860 | 0.880           | 0.726 | 0.844 | 0.922 | 0.951           | 0.845 | 0.917 | 0.981 |
|          | 50   | 0.821           | 0.751 | 0.846 | 0.972 | 0.877           | 0.823 | 0.912 | 0.989 | 0.959           | 0.929 | 0.970 | 0.999 |
|          | 100  | 0.878           | 0.824 | 0.868 | 0.995 | 0.926           | 0.890 | 0.921 | 0.998 | 0.981           | 0.964 | 0.978 | 1.000 |
|          | 500  | 0.889           | 0.877 | 0.895 | 1.000 | 0.939           | 0.931 | 0.949 | 1.000 | 0.982           | 0.984 | 0.984 | 1.000 |
|          | 1000 | 0.894           | 0.881 | 0.897 | 1.000 | 0.956           | 0.944 | 0.948 | 1.000 | 0.990           | 0.991 | 0.991 | 1.000 |
| 0.01     | 10   | 0.738           | 0.513 | 0.606 | 0.680 | 0.816           | 0.601 | 0.687 | 0.760 | 0.920           | 0.704 | 0.821 | 0.867 |
|          | 20   | 0.791           | 0.633 | 0.766 | 0.868 | 0.870           | 0.718 | 0.845 | 0.920 | 0.948           | 0.848 | 0.935 | 0.975 |
|          | 50   | 0.840           | 0.752 | 0.837 | 0.967 | 0.893           | 0.843 | 0.898 | 0.987 | 0.967           | 0.923 | 0.975 | 0.999 |
|          | 100  | 0.876           | 0.822 | 0.873 | 0.995 | 0.932           | 0.884 | 0.936 | 0.999 | 0.982           | 0.959 | 0.986 | 1.000 |
|          | 500  | 0.895           | 0.874 | 0.903 | 1.000 | 0.945           | 0.942 | 0.955 | 1.000 | 0.989           | 0.984 | 0.988 | 1.000 |
|          | 1000 | 0.901           | 0.897 | 0.905 | 1.000 | 0.948           | 0.942 | 0.955 | 1.000 | 0.993           | 0.991 | 0.995 | 1.000 |
| 0.02     | 10   | 0.754           | 0.509 | 0.625 | 0.686 | 0.814           | 0.573 | 0.687 | 0.770 | 0.906           | 0.710 | 0.820 | 0.882 |
|          | 20   | 0.758           | 0.642 | 0.729 | 0.847 | 0.836           | 0.722 | 0.804 | 0.904 | 0.944           | 0.826 | 0.924 | 0.962 |
|          | 50   | 0.827           | 0.732 | 0.848 | 0.968 | 0.906           | 0.818 | 0.910 | 0.991 | 0.974           | 0.933 | 0.969 | 0.999 |
|          | 100  | 0.858           | 0.798 | 0.854 | 0.995 | 0.922           | 0.868 | 0.935 | 0.998 | 0.976           | 0.960 | 0.986 | 1.000 |
|          | 500  | 0.897           | 0.871 | 0.889 | 1.000 | 0.946           | 0.935 | 0.946 | 1.000 | 0.990           | 0.990 | 0.990 | 1.000 |
|          | 1000 | 0.912           | 0.901 | 0.892 | 1.000 | 0.957           | 0.948 | 0.947 | 1.000 | 0.990           | 0.991 | 0.991 | 1.000 |
| 0.03     | 10   | 0.759           | 0.519 | 0.633 | 0.684 | 0.827           | 0.598 | 0.702 | 0.759 | 0.920           | 0.709 | 0.822 | 0.877 |
|          | 20   | 0.787           | 0.601 | 0.747 | 0.840 | 0.855           | 0.691 | 0.827 | 0.900 | 0.934           | 0.817 | 0.916 | 0.968 |
|          | 50   | 0.833           | 0.739 | 0.843 | 0.969 | 0.892           | 0.822 | 0.904 | 0.985 | 0.962           | 0.918 | 0.968 | 1.000 |
|          | 100  | 0.869           | 0.817 | 0.879 | 0.994 | 0.928           | 0.897 | 0.935 | 0.999 | 0.980           | 0.955 | 0.983 | 1.000 |
|          | 500  | 0.891           | 0.861 | 0.899 | 1.000 | 0.941           | 0.929 | 0.947 | 1.000 | 0.990           | 0.989 | 0.991 | 1.000 |
|          | 1000 | 0.875           | 0.880 | 0.892 | 1.000 | 0.939           | 0.943 | 0.943 | 1.000 | 0.989           | 0.983 | 0.989 | 1.000 |
| 0.04     | 10   | 0.736           | 0.495 | 0.606 | 0.659 | 0.804           | 0.560 | 0.684 | 0.733 | 0.898           | 0.684 | 0.804 | 0.863 |
|          | 20   | 0.776           | 0.641 | 0.751 | 0.855 | 0.855           | 0.725 | 0.835 | 0.916 | 0.938           | 0.840 | 0.925 | 0.974 |
|          | 50   | 0.821           | 0.735 | 0.859 | 0.963 | 0.896           | 0.813 | 0.902 | 0.985 | 0.973           | 0.918 | 0.969 | 0.998 |
|          | 100  | 0.855           | 0.815 | 0.870 | 0.994 | 0.923           | 0.896 | 0.932 | 0.998 | 0.984           | 0.958 | 0.983 | 1.000 |
|          | 500  | 0.891           | 0.877 | 0.898 | 1.000 | 0.938           | 0.923 | 0.951 | 1.000 | 0.989           | 0.982 | 0.995 | 1.000 |
|          | 1000 | 0.900           | 0.889 | 0.902 | 1.000 | 0.943           | 0.938 | 0.950 | 1.000 | 0.986           | 0.981 | 0.986 | 1.000 |

 $MC = 1000, L = 10, \rho = \rho_\lambda = 0.5$ .

### EC.3.7. A procedure to generate correlated random numbers for Monte Carlo experiments

Here we describe how we generate correlated random numbers in our Monte Carlo simulations. Basically, the method is inspired by Kneip et al. (2021). Assume that we want to generate a dataset of  $n$  observations from random variables  $V_j^{(t)}$  ( $j = 1, \dots, p; t = 1, 2$ ), where  $V_j^{(t)} \sim \text{Uniform}(d_{j,\min}^{(t)}, d_{j,\max}^{(t)})$  and  $\text{corr}(V_j^{(1)}, V_j^{(2)}) = \rho$  for all  $j$ . The details are as follows.

1. Construct the matrix

$$U = \begin{bmatrix} I_p & \rho I_p \\ 0 & \sqrt{1 - \rho^2} I_p \end{bmatrix} \quad (\text{EC.25})$$

where  $I_p$  is the identity matrix of order  $p$ . It can be seen that  $U'U = C$  where

$$C = \begin{bmatrix} I_p & \rho I_p \\ \rho I_p & I_p \end{bmatrix}. \quad (\text{EC.26})$$

2. Generate an  $n \times 2p$  matrix  $R$  of iid  $\mathcal{N}(0, 1)$ .
3. Compute the matrix  $D = \Phi(RU)$  where  $\Phi(\cdot)$  is the cdf of the standard normal distribution. Partition  $D$  into  $D = [D^{(1)}, D^{(2)}]$ , where  $D^{(t)} = [D_1^{(t)}, \dots, D_p^{(t)}]$  for  $t = 1, 2$ . Then it is clear that  $D_j^{(t)}$  follows uniform distribution on  $(0, 1)$  and  $\text{corr}(D_j^{(1)}, D_j^{(2)}) = \rho$  ( $j = 1, \dots, p; t = 1, 2$ ).
4. For each  $j = 1, \dots, p$ , transform  $D_j^{(t)}$  to  $V_j^{(t)} = (d_{j,\max}^{(t)} - d_{j,\min}^{(t)})D_j^{(t)} + d_{j,\min}^{(t)}$ . We then have numbers  $V_j^{(t)}$  follow uniform distribution on  $(d_{j,\min}^{(t)}, d_{j,\max}^{(t)})$  and  $\text{corr}(V_j^{(1)}, V_j^{(2)}) = \rho$ .
5. If we want to change the distribution of  $V_j^{(t)}$  for some  $t$  and  $j$  to a new one other than uniform distribution (e.g., half normal distribution plus unity:  $1 + |N(0, \sigma^2)|$ ), we just simply need to replace the transformation in step 4 by  $V_j^{(t)} = F^{-1}(D_j^{(t)})$  where  $F^{-1}$  is the quantile function of the desired distribution. By this way,  $\text{corr}(V_j^{(1)}, V_j^{(2)})$  might not be exactly  $\rho$  but is determined via a function of  $\rho$  which in turn depends on the new distribution. However, this does not raise any issue since our purpose in this paper is to ensure that the numbers generated are correlated and we can control the degree of correlation via the parameter  $\rho$ .

### EC.3.8. Computing the true parameters of interest

Similar to KSW2021, we only know the efficiency scores measured toward the true underlying production technology sets (i.e.,  $\lambda(\cdot|\Psi^t)$ ). Meanwhile those measured toward the conical hull of the production technology sets (i.e.,  $\lambda_C(\cdot|\Psi^t)$ ) are unknown (see step 3 of the data generating process mentioned in Section EC.3.1). We show how to obtain these figures below.

Assume that we have to measure the efficiency of a DMU represented by  $(x, y)$  toward  $\mathcal{C}(\Psi^t)$  ( $t = 1, 2$ ). Taking advantage of the fact that  $y \in \mathbb{R}_+^1$ , we can transform the efficiency score as follows.

$$\begin{aligned}
\lambda_C(x, y|\Psi^t) &= \sup_{\lambda} \{ \lambda : (x, \lambda y) \in \mathcal{C}(\Psi^t) \} = \sup_{\lambda} \{ \lambda : (x, \lambda y) = (a\tilde{x}, a\tilde{y}), (\tilde{x}, \tilde{y}) \in \Psi^t, a \in \mathbb{R}_+^1 \} \\
&= \sup_{\lambda} \{ \lambda : (x, \lambda y) = (a\tilde{x}, a\tilde{y}), \tilde{y} \leq \psi^t(\tilde{x}), \tilde{x} \in \mathbb{R}_+^p, a \in \mathbb{R}_+^1 \} \\
&= \sup_{\lambda} \{ \lambda : (x, \lambda y) = (a\tilde{x}, a\psi^t(\tilde{x})), \tilde{x} \in \mathbb{R}_+^p, a \in \mathbb{R}_+^1 \} \\
&= \sup_{a, \tilde{x}} \left\{ \frac{a\psi^t(\tilde{x})}{y} : a\tilde{x} = x, \tilde{x} \in \mathbb{R}_+^p, a \in \mathbb{R}_+^1 \right\} = \sup_a \left\{ \frac{a\psi^t(x/a)}{y} : a \in \mathbb{R}_+^1 \right\} \\
&= \frac{1}{y} \max_{a>0} \left( a\psi^t \left( \frac{x}{a} \right) \right). \tag{EC.27}
\end{aligned}$$

Now one can apply available optimization solvers (e.g., “fmincon” in MATLAB<sup>®</sup>) to solve for  $\max_{a>0} (a\psi^t(\frac{x}{a}))$  and then obtain  $\lambda_C(x, y|\Psi^t)$ . It is noteworthy that there is a potential risk of receiving a local optimum instead of the global one. Our further analysis below will demonstrate that the global optimum will be achieved.

We fix  $(x, y)$  and consider the function

$$\varphi(a) := a\psi^t(x/a) = a\Upsilon^t(x_1/a - b_1^t)^{\beta_1^t} (x_2/a - b_2^t)^{\beta_2^t} \dots (x_p/a - b_p^t)^{\beta_p^t} \tag{EC.28}$$

with the domain  $\mathbb{D} = \left( 0, \min_{j=1, \dots, p} \frac{x_j}{b_j^t} \right)$ . Its first derivative is presented below.

$$\begin{aligned}
\frac{d\varphi}{da} &= \Upsilon^t (x_1/a - b_1^t)^{\beta_1^t} (x_2/a - b_2^t)^{\beta_2^t} \dots (x_p/a - b_p^t)^{\beta_p^t} \\
&\quad - a\Upsilon^t \left[ \beta_1^t (x_1/a - b_1^t)^{\beta_1^t - 1} x_1 a^{-2} \right] (x_2/a - b_2^t)^{\beta_2^t} \dots (x_p/a - b_p^t)^{\beta_p^t} \\
&\quad - a\Upsilon^t (x_1/a - b_1^t)^{\beta_1^t} \left[ \beta_2^t (x_2/a - b_2^t)^{\beta_2^t - 1} x_2 a^{-2} \right] \dots (x_p/a - b_p^t)^{\beta_p^t} \dots
\end{aligned}$$

$$\begin{aligned}
& -a\Upsilon^t(x_1/a - b_1^t)^{\beta_1^t}(x_2/a - b_2^t)^{\beta_2^t} \dots \left[ \beta_p^t(x_p/a - b_p^t)^{\beta_p^t - 1} x_p a^{-2} \right] \\
& = \Upsilon^t(x_1/a - b_1^t)^{\beta_1^t}(x_2/a - b_2^t)^{\beta_2^t} \dots (x_p/a - b_p^t)^{\beta_p^t} \left( 1 - \frac{x_1 \beta_1^t}{a(x_1/a - b_1^t)} - \dots - \frac{x_p \beta_p^t}{a(x_p/a - b_p^t)} \right) \\
& = \psi^t(x/a) \left( 1 - \sum_{j=1}^p \frac{x_j \beta_j^t}{x_j - ab_j^t} \right) = \psi^t(x/a) \iota(a), \tag{EC.29}
\end{aligned}$$

where

$$\iota(a) = 1 - \sum_{j=1}^p \frac{x_j \beta_j^t}{x_j - ab_j^t}. \tag{EC.30}$$

Therefore, the sign of  $d\varphi/da$  is the same as that of  $\iota(a)$  and furthermore,  $d\varphi/da = 0$  if and only if  $\iota(a) = 0$ . Since  $\frac{d\iota}{da} = -\sum_{j=1}^p \frac{x_j \beta_j^t b_j^t}{(x_j - ab_j^t)^2} < 0 \forall a > 0$ ,  $\iota(a)$  is strictly decreasing. In addition,

$$\lim_{a \rightarrow 0^+} \iota(a) = 1 - \sum_{j=1}^p \beta_j^t > 0, \quad \lim_{a \rightarrow \frac{x_j}{b_j^t}^-} \iota(a) = -\infty, \quad \lim_{a \rightarrow \frac{x_j}{b_j^t}^+} \iota(a) = +\infty, \quad \lim_{a \rightarrow +\infty} \iota(a) = 1 > 0.$$

Hence,  $\iota(a) = 0$  has only one solution in the domain  $\mathbb{D}$ , say  $a^*$ . Moreover, the above findings show that  $\iota(a)$  changes sign from positive to negative when passing  $a^*$  in the left-right direction, and hence, so is  $d\varphi/da$ . This implies that  $a^*$  is the global maximum of  $\varphi(a)$  in the domain  $\mathbb{D}$  as desired.

**Table EC.10** True values of parameter  $\xi$ .

| $\delta$ | $p=1, q=1$ | $p=2, q=1$ | $p=3, q=1$ | $p=4, q=1$ |
|----------|------------|------------|------------|------------|
| 0.00     | 0.00000    | 0.00000    | 0.00000    | 0.00000    |
| 0.01     | 0.02528    | 0.03916    | 0.05088    | 0.06385    |
| 0.02     | 0.05050    | 0.07820    | 0.10189    | 0.12791    |
| 0.03     | 0.07567    | 0.11745    | 0.15292    | 0.19215    |
| 0.04     | 0.10079    | 0.15663    | 0.20415    | 0.25657    |

$$n = 10 \times 10^6, \rho = \rho_\lambda = 0.5.$$

The true values of the parameter  $\xi$  are reported in Table EC.10. Note that we set  $\xi = 0$  for  $\delta = 0$  since the production frontier functions  $\psi^1(x)$  and  $\psi^2(x)$  are identical here and hence there is no productivity change. Prior Monte Carlo simulations (with  $n = 10 \times 10^6$ ) also justify this point with some acceptable noises due to finite  $n$ , e.g.,  $\xi = 7 \times 10^{-8}$  for  $p = 1$ .

## Appendix EC.4: Empirical data and computational codes

Table EC.11: Data Used in the Empirical Illustration (from PWT10)

| COUNTRY                | Labor 1990<br>( <i>millions</i> ) | Capital 1990<br>( <i>mil. 2017US\$</i> ) | GDP 1990<br>( <i>mil. 2017US\$</i> ) | Labor 2019<br>( <i>millions</i> ) | Capital 2019<br>( <i>mil. 2017US\$</i> ) | GDP 2019<br>( <i>mil. 2017US\$</i> ) | D |
|------------------------|-----------------------------------|------------------------------------------|--------------------------------------|-----------------------------------|------------------------------------------|--------------------------------------|---|
| Albania                | 1.324                             | 61056.902                                | 12096.719                            | 1.076                             | 229818.328                               | 36103.043                            | 0 |
| Argentina              | 11.811                            | 688641.750                               | 204212.688                           | 20.643                            | 3374818.500                              | 977420.562                           | 0 |
| Armenia                | 1.833                             | 58440.266                                | 24350.492                            | 0.966                             | 98945.867                                | 43582.574                            | 0 |
| Australia              | 7.845                             | 2247378.750                              | 507695.969                           | 12.863                            | 5899094.000                              | 1364677.750                          | 1 |
| Austria                | 3.560                             | 992590.125                               | 205574.156                           | 4.550                             | 2875459.750                              | 477705.500                           | 1 |
| Azerbaijan             | 3.878                             | 111656.461                               | 76027.461                            | 5.027                             | 273638.750                               | 159346.000                           | 0 |
| Belgium                | 3.861                             | 1150535.500                              | 261314.031                           | 4.922                             | 3496175.000                              | 517419.750                           | 1 |
| Bulgaria               | 4.097                             | 86723.477                                | 106472.703                           | 3.420                             | 458279.156                               | 149432.422                           | 0 |
| Belarus                | 5.126                             | 712582.625                               | 145477.172                           | 4.306                             | 656323.125                               | 204795.344                           | 0 |
| Bolivia (Pl. State of) | 2.890                             | 34102.156                                | 16026.933                            | 5.544                             | 215585.516                               | 98835.711                            | 0 |
| Brazil                 | 61.632                            | 3226204.500                              | 954572.000                           | 93.957                            | 13677290.000                             | 3080048.500                          | 0 |
| Canada                 | 13.290                            | 3838143.500                              | 941469.375                           | 19.299                            | 8721109.000                              | 1866214.875                          | 1 |
| Switzerland            | 3.833                             | 1428866.500                              | 281175.219                           | 5.011                             | 3225664.000                              | 646919.625                           | 1 |
| Chile                  | 4.323                             | 340115.500                               | 106364.055                           | 8.100                             | 2075795.000                              | 440683.344                           | 0 |
| China                  | 660.477                           | 5404394.500                              | 2856361.250                          | 798.808                           | 101544168.000                            | 20257660.000                         | 0 |
| Colombia               | 10.505                            | 908843.438                               | 252406.266                           | 21.200                            | 2194572.500                              | 707659.625                           | 0 |
| Costa Rica             | 1.085                             | 50398.020                                | 26685.379                            | 2.256                             | 236104.750                               | 93491.828                            | 0 |
| Czech Republic         | 5.414                             | 1184608.250                              | 250625.656                           | 5.481                             | 2375330.250                              | 401072.219                           | 0 |
| Germany                | 39.548                            | 9745840.000                              | 2221450.250                          | 44.795                            | 20907856.000                             | 4275312.000                          | 1 |
| Denmark                | 2.634                             | 607417.000                               | 143015.422                           | 2.972                             | 1594880.000                              | 311838.000                           | 1 |
| Dominican Republic     | 2.106                             | 90115.703                                | 36452.879                            | 5.127                             | 774568.875                               | 192514.500                           | 0 |
| Ecuador                | 3.336                             | 214565.938                               | 63273.090                            | 8.247                             | 1162897.125                              | 195204.016                           | 0 |
| Spain                  | 14.039                            | 3213968.500                              | 728396.125                           | 19.872                            | 11827519.000                             | 1886595.250                          | 1 |
| Estonia                | 0.829                             | 73727.727                                | 19404.123                            | 0.673                             | 219444.094                               | 44876.348                            | 0 |
| Finland                | 2.473                             | 696621.375                               | 137362.797                           | 2.674                             | 1281196.500                              | 248551.547                           | 1 |
| France                 | 23.660                            | 6785194.000                              | 1581094.750                          | 28.533                            | 17987252.000                             | 2946958.250                          | 1 |
| United Kingdom         | 26.704                            | 4443014.500                              | 1445536.750                          | 32.982                            | 15302674.000                             | 2989895.500                          | 1 |
| Greece                 | 4.063                             | 1109733.500                              | 181550.156                           | 4.235                             | 2565751.000                              | 284893.625                           | 1 |
| Guatemala              | 3.119                             | 67479.258                                | 37128.180                            | 7.093                             | 450848.750                               | 136605.016                           | 0 |
| China, Hong Kong SAR   | 2.731                             | 403845.594                               | 187216.141                           | 3.864                             | 2566180.000                              | 407575.750                           | 1 |
| Honduras               | 1.444                             | 28410.459                                | 16123.038                            | 3.833                             | 235830.922                               | 52902.539                            | 0 |
| Croatia                | 2.178                             | 198289.812                               | 65532.152                            | 1.818                             | 602383.250                               | 107392.039                           | 0 |
| Hungary                | 5.126                             | 459231.188                               | 147425.906                           | 4.712                             | 1428009.375                              | 283145.156                           | 0 |
| Indonesia              | 73.691                            | 989806.875                               | 625933.562                           | 131.171                           | 18173848.000                             | 3137931.000                          | 0 |
| India                  | 345.387                           | 2664443.750                              | 1248876.875                          | 497.616                           | 35324124.000                             | 9170555.000                          | 0 |
| Ireland                | 1.215                             | 231919.500                               | 66850.164                            | 2.260                             | 1868599.250                              | 501053.594                           | 1 |
| Iceland                | 0.138                             | 45228.027                                | 8657.975                             | 0.192                             | 93709.984                                | 17972.625                            | 1 |
| Israel                 | 1.735                             | 385235.938                               | 105208.664                           | 4.229                             | 1226272.125                              | 328529.531                           | 1 |
| Italy                  | 22.803                            | 6936038.000                              | 1541241.875                          | 25.596                            | 18855818.000                             | 2466327.500                          | 1 |
| Jamaica                | 0.896                             | 35057.539                                | 12786.100                            | 1.245                             | 152178.188                               | 24867.324                            | 0 |
| Japan                  | 65.104                            | 14416034.000                             | 3658643.500                          | 69.977                            | 26102876.000                             | 5036891.000                          | 1 |
| Kazakhstan             | 7.556                             | 635239.000                               | 201472.328                           | 8.821                             | 1148598.750                              | 525124.062                           | 0 |
| Kenya                  | 9.065                             | 102847.047                               | 54920.566                            | 25.074                            | 540344.688                               | 222738.469                           | 0 |
| Kyrgyzstan             | 1.743                             | 62718.914                                | 36275.133                            | 2.671                             | 87622.602                                | 39366.727                            | 0 |
| Republic of Korea      | 18.206                            | 1737276.500                              | 593101.812                           | 26.799                            | 11164507.000                             | 2162705.250                          | 1 |
| Sri Lanka              | 5.043                             | 97555.164                                | 58180.059                            | 8.180                             | 828180.250                               | 283395.000                           | 0 |
| Lithuania              | 1.706                             | 118734.898                               | 54314.094                            | 1.380                             | 379209.500                               | 89642.180                            | 0 |
| Latvia                 | 1.254                             | 140698.047                               | 44794.594                            | 0.897                             | 460683.312                               | 56079.445                            | 0 |
| Morocco                | 7.549                             | 351582.594                               | 112781.969                           | 11.522                            | 1531662.875                              | 288999.750                           | 0 |

Continued on next page

Table EC.11 – *continued from previous page*

| COUNTRY                | Labor 1990<br>( <i>millions</i> ) | Capital 1990<br>( <i>mil. 2017US\$</i> ) | GDP 1990<br>( <i>mil. 2017US\$</i> ) | Labor 2019<br>( <i>millions</i> ) | Capital 2019<br>( <i>mil. 2017US\$</i> ) | GDP 2019<br>( <i>mil. 2017US\$</i> ) | D |
|------------------------|-----------------------------------|------------------------------------------|--------------------------------------|-----------------------------------|------------------------------------------|--------------------------------------|---|
| Republic of Moldova    | 2.058                             | 101708.656                               | 27612.031                            | 1.429                             | 116100.477                               | 38162.605                            | 0 |
| Madagascar             | 5.151                             | 17904.010                                | 16515.250                            | 13.945                            | 101824.883                               | 41507.461                            | 0 |
| Mexico                 | 28.223                            | 2886328.250                              | 1039442.875                          | 54.994                            | 10933568.000                             | 2390322.500                          | 0 |
| North Macedonia        | 0.959                             | 39136.957                                | 13045.395                            | 0.859                             | 138411.672                               | 32876.156                            | 0 |
| Mauritius              | 0.404                             | 14596.421                                | 12508.182                            | 0.583                             | 97370.297                                | 29758.160                            | 0 |
| Malawi                 | 3.874                             | 16439.533                                | 9986.730                             | 7.950                             | 24313.982                                | 21635.066                            | 0 |
| Malaysia               | 6.832                             | 571888.000                               | 168216.734                           | 15.118                            | 3598296.250                              | 822237.375                           | 0 |
| Nigeria                | 29.960                            | 908735.312                               | 92692.852                            | 73.021                            | 3203823.500                              | 1001537.313                          | 0 |
| Netherlands            | 6.808                             | 1743256.375                              | 425511.375                           | 9.457                             | 4745302.500                              | 950077.938                           | 1 |
| Norway                 | 2.061                             | 636545.375                               | 139160.562                           | 2.854                             | 1723067.250                              | 396253.875                           | 1 |
| New Zealand            | 1.521                             | 274668.281                               | 78282.383                            | 2.506                             | 656662.812                               | 198604.609                           | 1 |
| Panama                 | 0.701                             | 34511.410                                | 17177.756                            | 1.920                             | 524603.062                               | 126883.188                           | 0 |
| Peru                   | 7.723                             | 227863.094                               | 81677.820                            | 16.890                            | 1466834.875                              | 397821.031                           | 0 |
| Philippines            | 22.012                            | 547520.938                               | 253960.750                           | 42.425                            | 2753356.000                              | 913426.812                           | 0 |
| Poland                 | 15.083                            | 1251424.875                              | 324730.812                           | 16.159                            | 3148161.000                              | 1211846.250                          | 0 |
| Portugal               | 4.467                             | 795612.188                               | 156697.391                           | 4.962                             | 2913985.250                              | 325160.031                           | 1 |
| Paraguay               | 1.544                             | 60377.164                                | 22101.969                            | 3.358                             | 288482.906                               | 86788.555                            | 0 |
| Romania                | 10.901                            | 435373.125                               | 192325.672                           | 8.680                             | 1805810.125                              | 540045.750                           | 0 |
| Russian Federation     | 75.279                            | 14899058.000                             | 2493859.500                          | 71.671                            | 19423886.000                             | 4161194.500                          | 0 |
| Singapore              | 1.530                             | 206869.391                               | 86285.148                            | 3.760                             | 2148978.000                              | 477907.875                           | 1 |
| Sierra Leone           | 1.475                             | 2868.818                                 | 6813.255                             | 2.536                             | 16960.162                                | 14651.260                            | 0 |
| Slovakia               | 2.450                             | 394413.062                               | 104279.203                           | 2.469                             | 777340.312                               | 149921.438                           | 0 |
| Slovenia               | 1.129                             | 195457.500                               | 40194.348                            | 1.047                             | 493944.844                               | 70868.516                            | 0 |
| Sweden                 | 4.604                             | 1200367.125                              | 259599.234                           | 5.002                             | 2743785.000                              | 526240.812                           | 1 |
| Syrian Arab Republic   | 3.307                             | 24667.023                                | 18222.824                            | 4.761                             | 407660.312                               | 123085.008                           | 0 |
| Thailand               | 28.705                            | 837414.500                               | 335173.781                           | 37.541                            | 5630091.000                              | 1191732.875                          | 0 |
| Tajikistan             | 1.943                             | 87706.352                                | 37711.543                            | 2.683                             | 357036.719                               | 36293.750                            | 0 |
| Turkey                 | 17.739                            | 1649038.375                              | 617188.000                           | 28.087                            | 10235724.000                             | 2248225.750                          | 0 |
| Taiwan                 | 8.649                             | 953378.375                               | 455792.906                           | 11.500                            | 4258740.000                              | 1103379.750                          | 1 |
| Ukraine                | 25.068                            | 3192392.250                              | 614836.375                           | 16.499                            | 7085837.500                              | 578290.500                           | 0 |
| Uruguay                | 1.264                             | 104580.078                               | 30050.559                            | 1.635                             | 318946.031                               | 71122.789                            | 0 |
| United States          | 123.046                           | 38223704.000                             | 9978170.000                          | 158.300                           | 69059088.000                             | 20595844.000                         | 1 |
| Venezuela (B. Rep. of) | 6.405                             | 766267.312                               | 166738.797                           | 11.694                            | 217905.094                               | 7160.107                             | 0 |
| Zambia                 | 2.389                             | 39799.594                                | 10770.718                            | 5.225                             | 303724.188                               | 56783.715                            | 0 |
| Zimbabwe               | 4.568                             | 37124.984                                | 55290.629                            | 6.831                             | 69588.242                                | 40826.570                            | 0 |

This data is originally from the Penn World Tables (version 10) for the sample of countries considered by Badunenko et al (2008). D = 1 if “developed”, D = 0 if “developing”.

MATLAB codes to replicate the empirical illustration are available at:

[https://www.dropbox.com/s/2uqfchkw8w53rl6/MATLAB%20codes%20for%20EmpIllustr.PSZ2023\\_OpRe.v1.zip?dl=0](https://www.dropbox.com/s/2uqfchkw8w53rl6/MATLAB%20codes%20for%20EmpIllustr.PSZ2023_OpRe.v1.zip?dl=0).
